# Supplementary figures and images for: Free-standing monolayer films of ordered colloidal particles
Source: Royal Society of Chemistry journal article supplement (doi:10.1039/c7sm00407a), 2017-01-01

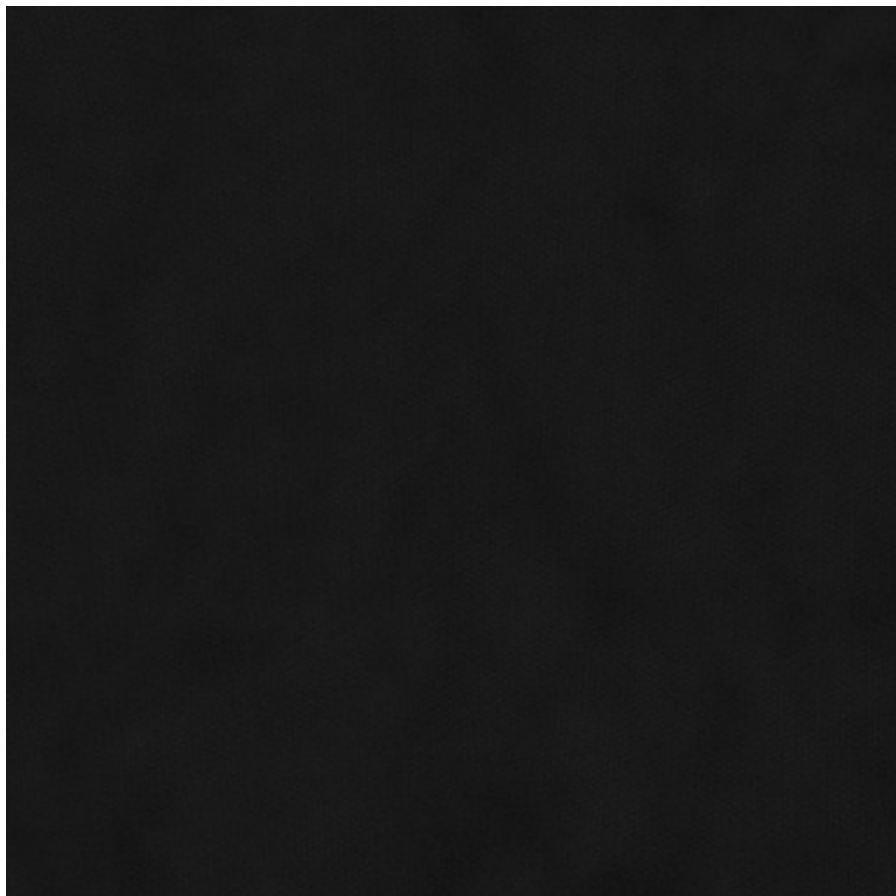

Supplement: c7sm00407a1.pdf [file c7sm00407a1.pdf]
